# Supplementary material for: Cost-Effectiveness of Short Course of Ceftazidime/Avibactam for K. pneumoniae-KPC Bloodstream Infections in Italy
Source: MDPI journal article supplement (doi:10.3390/microorganisms11051102), 2023-04-23
Supplement: s1 [file s1]

**Table S1: Patient characteristics on 30-day mortality**

| Variable                       | Alive on day 30<br>N= 329 (62.7) | Dead on day 30<br>N=195 (37.2) | Total<br>N=524 (100) | p-value |
|--------------------------------|----------------------------------|--------------------------------|----------------------|---------|
| I. Demographics                |                                  |                                |                      |         |
| Gender:                        |                                  |                                |                      |         |
| Male                           | 209 (63.9)                       | 118 (60.5)                     | 327 (62.6)           | 0.437   |
| Female                         | 118 (36.1)                       | 77 (39.5)                      | 195 (37.4)           |         |
| Age                            | 61.4 ± 15.2                      | 64.6 ± 14                      | 62 ± 14              |         |
| Ward:                          |                                  |                                |                      | 0.350   |
| • Medical ward                 | 119 (36.4)                       | 63 (32.3)                      | 182 (34.9)           |         |
| • Surgical ward                | 115 (35.2)                       | 65 (33.3)                      | 180 (34.5)           |         |
| • Intensive care unit          | 93 (28.4)                        | 67 (34.4)                      | 160 (30.7)           |         |
| ICU vs. other wards            | 94 (28.7)                        | 67 (34.4)                      | 161 (30.8)           | 0.179   |
| Length of stay                 | 53 ± 31                          | 30 ± 20                        | 41 ± 25              | 0.005   |
| II. Clinical course            |                                  |                                |                      |         |
| Comorbidities:                 |                                  |                                |                      |         |
| • Congestive heart failure     | 70 (21.5)                        | 60 (30.8)                      | 130 (25)             | 0.018   |
| • Chronic lung disease         | 63 (19.3)                        | 51 (26.2)                      | 114 (21.9)           | 0.068   |
| • Liver disease                | 26 (8.0)                         | 23 (11.8)                      | 49 (9.4)             | 0.148   |
| • Chronic Kidney Disease       | 72 (22.0)                        | 54 (27.7)                      | 126 (24.1)           | 0.143   |
| • Metastatic malignancy        | 19 (5.8)                         | 14 (7.2)                       | 33 (6.3)             | 0.534   |
| • Hematologic malignancy       | 29 (8.9)                         | 23 (11.8)                      | 52 (10.0)            | 0.280   |
| • Diabetes mellitus            | 64 (20.4)                        | 44 (23.3)                      | 108 (21.5)           | 0.443   |
| • Neutropenia                  | 15 (4.8)                         | 8 (4.2)                        | 23 (4.6)             | 0.777   |
| • SOT                          | 42 (12.8)                        | 22 (11.3)                      | 64 (12.3)            | 0.588   |
| • HIV                          | 0 (0.0)                          | 2 (1.0)                        | 2 (0.4)              | 0.139   |
| Surgery during stay:           |                                  |                                |                      |         |
| • Surgery other than abdominal | 96 (30.9)                        | 65 (34.4)                      | 161 (32.2)           | 0.385   |
| • Abdominal surgery            | 77 (24.8)                        | 37 (19.6)                      | 114 (22.8)           | 0.028   |
| Charlson score                 | 3.3 ± 2,1                        | 3.8 ± 2.3                      | 4 ± 2                |         |
| Invasive Procedures:           |                                  |                                |                      |         |
| • CVC                          | 272 (83.2)                       | 178 (91.3)                     | 450 (86.2)           | 0.009   |
| • Mechanical Ventilation       | 143 (43.7)                       | 126 (64.6)                     | 269 (51.5)           | <0.001  |
| • Urinary catheter             | 244 (46.5)                       | 164 (31.2)                     | 408 (77.8)           | 0.013   |

|                                              |            |            |            |                  |
|----------------------------------------------|------------|------------|------------|------------------|
| • ECMO                                       | 16 (4.9)   | 26 (13.3)  | 42 (8.1)   | <b>&lt;0.001</b> |
| • Hemodialysis                               | 21 (6.4)   | 28 (14.4)  | 49 (9.4)   | <b>0.006</b>     |
| • CVVH                                       | 41 (12.6)  | 54 (27.7)  | 95 (18.2)  | <b>&lt;0.001</b> |
| <b>Possible source:</b>                      |            |            |            | <b>&lt;0.001</b> |
| • Respiratory                                | 52 (16.4)  | 48 (26.1)  | 100 (20)   |                  |
| • CVC                                        | 82 (25.9)  | 36 (19.6)  | 118 (23.6) |                  |
| • Urinary catheter                           | 35 (11)    | 5 (2.7)    | 40 (8)     |                  |
| • Intraabdominal                             | 23 (7.3)   | 13 (7.1)   | 36 (7.2)   |                  |
| • Multiple sites                             | 23 (7.3)   | 13 (7.1)   | 36 (7.2)   |                  |
| • Unidentified                               | 85 (26.8)  | 67 (36.4)  | 152 (30.2) |                  |
| Source control                               | 114 (36)   | 35 (18.9)  | 149 (29.7) | <b>&lt;0.001</b> |
| <b>III. Microbiological characteristics:</b> |            |            |            |                  |
| Time to KPC BSI from admission               | 29.8 ± 33  | 26.4 ± 24  | 28 ± 30    | 0.825            |
| KPC colonization                             | 179 (57)   | 97 (51.3)  | 276 (54.9) | 0.215            |
| <b>KPC in samples:</b>                       |            |            |            |                  |
| • Respiratory                                | 114 (34.9) | 76 (39.0)  | 190 (36.4) | 0.345            |
| • Urinary                                    | 90 (27.4)  | 35 (17.9)  | 125 (23.9) | <b>0.014</b>     |
| • Drainage                                   | 44 (13.5)  | 23 (11.8)  | 67 (12.8)  | 0.583            |
| <b>MDR Colonization:</b>                     | 21 (6.4)   | 12 (6.2)   | 33 (6.3)   | 0.903            |
| • A-baumannii                                | 11 (3.4)   | 9 (4.6)    | 20 (3.8)   | 0.471            |
| • VRE                                        | 7 (2.1)    | 2 (1.0)    | 9 (1.7)    | 0.495            |
| • ESBL                                       | 3 (0.9)    | 2 (1.0)    | 5 (1.0)    | >0.99            |
| <i>Clostridium difficile</i>                 | 9 (2.8)    | 4 (2.1)    | 13 (2.5)   | 0.775            |
| <b>Polymicrobial BSI:</b>                    | 29 (8.9)   | 18 (9.2)   | 47 (9)     | 0.889            |
| • P.aeruginosa                               | 1 (0.3)    | 5 (2.6)    | 6 (1.1)    | 0.029            |
| • VRE                                        | 5 (1.5)    | 4 (2.1)    | 9 (1.7)    | 0.733            |
| • ESBL                                       | 9 (2.8)    | 3 (1.5)    | 12 (2.3)   | 0.549            |
| • MRSA                                       | 5 (1.5)    | 0          | 5 (1.0)    | 0.163            |
| • Candida                                    | 2 (0.6)    | 5 (2.6)    | 7 (1.3)    | 0.108            |
| <b>Post BSI:</b>                             |            |            |            |                  |
| • MRSA                                       | 1(0.3)     | 0(0.0)     | 1(0.2)     | >0.99            |
| • Candidemia                                 | 4(1.2)     | 3(1.5)     | 7(1.3)     | 0.715            |
| • CDI                                        | 5(1.5)     | 2(1.0)     | 7(1.3)     | >0.99            |
| General Combination                          | 2 ± 1      | 2 ± 1      | 2 ± 1      | 0.255            |
| <b>Empiric therapy:</b>                      | 217 (66.6) | 151 (77.8) | 368 (70.8) | <b>0.006</b>     |
| • Empiric therapy appropriate                | 110 (48.7) | 72 (46.5)  | 182 (47.8) | 0.670            |
| • Days Empiric therapy                       | 10 ± 9     | 10 ± 8     | 11 ± 10    | 0.438            |
| • Combination empiric                        | 1 ± 1      | 2 ± 1      | 2 ± 1      | <b>0.003</b>     |
| • Meropenem                                  | 106 (50.7) | 77 (52.4)  | 183 (51.4) | 0.757            |

|                                                          |                   |                   |                   |                  |
|----------------------------------------------------------|-------------------|-------------------|-------------------|------------------|
| • Amikacin                                               | 21 (10)           | 9 (6.2)           | 30 (8.4)          | 0.200            |
| • Tigecycline                                            | 61 (29.2)         | 56 (38.4)         | 117 (33)          | 0.071            |
| • Colistin                                               | 40 (19.2)         | 31 (21.1)         | 71 (20)           | 0.666            |
| • Piperacillin tazobactam                                | 66 (31.6)         | 69 (46)           | 135 (37.6)        | <b>0.005</b>     |
| • Bactrim                                                | 11 (5.3)          | 8 (5.5)           | 19 (5.4)          | 0.937            |
| • Fosfomycin                                             | 12 (5.7)          | 9 (6)             | 21 (5.8)          | 0.900            |
| • Ceftazidime-avibactam                                  | 14 (6.5)          | 6 (4.1)           | 20 (5.5)          | 0.320            |
| <b>Targeted therapy:</b>                                 | <b>236 (72.8)</b> | <b>111 (57.8)</b> | <b>347 (67.2)</b> | <b>&lt;0.001</b> |
| • Days Targeted Therapy                                  | 17 ± 14           | 9 ± 7             | 15 ± 13           | <b>&lt;0.001</b> |
| • Combination targeted                                   | 2 ± 1             | 2 ± 1             | 2 ± 1             | 0.32             |
| • Meropenem                                              | 103 (46.2)        | 54 (50.9)         | 157 (47.7)        | 0.420            |
| • Amikacin                                               | 23 (10.5)         | 8 (7.5)           | 31 (9.5)          | 0.402            |
| • Tigecycline                                            | 119 (54.1)        | 74 (69.8)         | 193 (59.2)        | <b>0.007</b>     |
| • Colistin                                               | 65 (29.1)         | 47 (43.9)         | 112 (33.9)        | <b>0.008</b>     |
| • Gentamycin                                             | 103 (45.8)        | 47 (44.3)         | 150 (45.3)        | 0.806            |
| • Ertapenem                                              | 29 (13.1)         | 7 (6.7)           | 36 (11)           | 0.082            |
| • Bactrim                                                | 26 (11.8)         | 7 (6.7)           | 33 (10.1)         | 0.154            |
| • Fosfomycin                                             | 33 (14.6)         | 14 (13.1)         | 47 (14.1)         | 0.710            |
| • Ceftazidime-avibactam                                  | 59 (25)           | 22 (19.3)         | 81 (23.1)         | 0.236            |
| Monotherapy                                              | 99 (30.7)         | 51 (27.1)         | 150 (29.4)        | 0.387            |
| On-time therapy                                          | 197 (61.2)        | 117 (61.3)        | 314 (61.2)        | 0.986            |
| KPC reoccurrence                                         | 27 (8.2)          | 2 (1)             | 29 (5.5)          | <b>&lt;0.001</b> |
| <b>7-day nephrotoxicity:</b>                             |                   |                   |                   | <b>&lt;0.001</b> |
| • Nephrotoxicity                                         | 33 (17.7)         | 49 (39.8)         | 82 (26.5)         |                  |
| • Acute renal failure at baseline or death before 7 days | 42 (22.6)         | 36 (29.3)         | 78 (25.2)         |                  |
| Time to death                                            | 57.7 ± 33         | 10 ± 8.2          | 21 ± 26           | <b>&lt;0.001</b> |
| In-hospital mortality                                    | 50 (15.2)         | 175 (89.7)        | 225 (43)          | <b>&lt;0.001</b> |

ICU: intensive care unit, SOT: solid organ transplant, HIV: Human immunodeficiency virus, CVC: central venous catheter, ECMO: extracorporeal membrane oxygenation, CVVH: continuous veno-venous hemofiltration, KPC: Klebsiella pneumoniae carbapenemase, VRE: vancomycin resistant enterococci, ESBL: extended spectrum beta lactamase, MRSA: methicillin resistant Staphylococcus aureus, CDI: Clostridium difficile infection.

**Table S2: Patient characteristics based on ceftazidime-avibactam therapy vs. standard of care (SOC)**

| Variable                          | CZA<br>81 (15.4) | SOC<br>269 (51.3) | Total<br>524 (100) | p-value          |
|-----------------------------------|------------------|-------------------|--------------------|------------------|
| <b><i>I. Demographics</i></b>     |                  |                   |                    |                  |
| <b>Gender:</b>                    |                  |                   |                    | 0.52             |
| Male                              | 63 (67)          | 224 (63.5)        | 287 (64.2)         |                  |
| Female                            | 31 (33)          | 129 (36.5)        | 160 (35.8)         |                  |
| Age                               | 72 ± 13          | 58 ± 14           | 62 ± 14            | 0.06             |
| <b>Ward:</b>                      |                  |                   |                    | 0.105            |
| • Medical ward                    | 23 (24.5)        | 125 (35.4)        | 148 (33.1)         |                  |
| • Surgical ward                   | 36 (38.3)        | 126 (35.7)        | 162 (36.2)         |                  |
| • Intensive care unit             | 35 (37.2)        | 102 (28.9)        | 137 (30.6)         |                  |
| ICU vs. other wards               | 36 (38.3)        | 102 (28.9)        | 138 (30.9)         | 0.079            |
| Length of stay                    | 44 ± 22          | 115 ± 89          | 79 ± 55            | <b>0.005</b>     |
| <b><i>II. Clinical course</i></b> |                  |                   |                    |                  |
| <b>Comorbidities:</b>             |                  |                   |                    |                  |
| • Congestive heart failure        | 25 (26.9)        | 73 (20.7)         | 98 (22)            |                  |
| • Chronic lung disease            | 26 (28)          | 68 (19.3)         | 94 (21.1)          | 0.2              |
| • Liver disease                   | 11 (25.6)        | 32 (9.1)          | 43 (9.6)           | 0.442            |
| • Chronic Kidney Disease          | 27 (28.7)        | 83 (23.5)         | 110 (24.6)         | 0.297            |
| • Metastatic malignancy           | 4 (4.3)          | 21 (5.9)          | 25 (5.6)           | 0.623            |
| • Hematologic malignancy          | 6 (6.4)          | 38 (10.8)         | 44 (9.8)           | 0.205            |
| • Diabetes mellitus               | 18 (22.8)        | 74 (21.1)         | 92 (21.4)          | 0.739            |
| • Neutropenia                     | 1 (1.3)          | 16 (4.6)          | 17 (4)             | 0.333            |
| • Solid Organ Transplant          | 22 (23.2)        | 36 (3.5)          | 58 (12.9)          | <b>&lt;0.001</b> |
| • HIV                             | 0                | 2 (0.6)           | 2 (0.6)            | > 0.99           |
| Surgery during hospitalization    |                  |                   |                    | 0.390            |
| • Surgery not abdominal           | 19 (25)          | 115 (32.8)        | 134 (31.4)         |                  |
| • Abdominal surgery               | 20 (26.3)        | 77 (21.9)         | 97 (22.7)          |                  |
| Charlson score                    | 4.7 ± 2          | 4.5 ± 2           | 3.6 ± 2            | 0.884            |
| <b>Invasive Procedures:</b>       |                  |                   |                    |                  |

|                                              |           |            |            |                   |
|----------------------------------------------|-----------|------------|------------|-------------------|
|                                              |           |            |            |                   |
| • CVC                                        | 7 (7.4)   | 53 (15)    | 60 (13.4)  | <b>0.056</b>      |
| • Mechanical Ventilation                     | 50 (53.2) | 178 (50.4) | 228 (51)   | 0.633             |
| • Urinary catheter                           | 67 (72)   | 278 (78.8) | 345 (77.4) | 0.169             |
| • ECMO                                       | 8 (8.6)   | 26 (7.4)   | 34 (7.6)   | 0.689             |
| • Hemodialysis                               | 18 (19.1) | 20 (5.7)   | 38 (8.5)   | <b>&lt; 0.001</b> |
| • CVVH                                       | 14 (15.1) | 63 (17.8)  | 77 (17.3)  | 0.526             |
| <b>Possible source:</b>                      |           |            |            | 0.798             |
| • Respiratory                                | 17 (21.8) | 74 (21.1)  | 91 (21.2)  |                   |
| • CVC                                        | 22 (28.2) | 78 (22.8)  | 100 (23.3) |                   |
| • Urinary catheter                           | 8 (10.3)  | 29 (8.3)   | 37 (8.6)   |                   |
| • Intraabdominal                             | 7 (9)     | 41 (11.7)  | 48 (31)    |                   |
| • Multiple sites                             | 5 (6.4)   | 26 (7.4)   | 31 (7.2)   |                   |
| • Unidentified                               | 19 (24.4) | 103 (9.3)  | 122 (28.4) |                   |
| Source control                               | 26 (32.9) | 105 (29.9) | 131 (30.5) | 0.785             |
| <b>III. Microbiological characteristics:</b> |           |            |            |                   |
| Time to KPC BSI                              | 24 ± 16   | 27 ± 20    | 28 ± 30    | 0.068             |
| KPC-Kp colonization                          | 65 (82.3) | 159 (45.3) | 224 (52.1) | <b>&lt;0.001</b>  |
| <b>KPC in samples:</b>                       |           |            |            |                   |
| • Respiratory                                | 37 (39.4) | 118 (33.4) | 155 (34.7) | 0.283             |
| • Urinary                                    | 24 (25.3) | 91 (25.8)  | 115 (25.7) | 0.919             |
| • Drainage                                   | 8 (8.5)   | 51 (14.4)  | 59 (13.2)  | 0.131             |
| <b>MDR Colonization:</b>                     | 12 (12.8) | 15 (4.2)   | 27 (6)     | <b>0.002</b>      |
| • A.baumannii                                | 12 (12.8) | 7 (2)      | 19 (4.3)   | <b>&lt;0.001</b>  |
| • VRE                                        | 1 (1.1)   | 6 (1.7)    | 7 (1.6)    | > 0.99            |
| CDI pre                                      | 5 (5.3)   | 8 (2.3)    | 13 (2.9)   | 0.118             |
| <b>Polymicrobial BSI:</b>                    | 5 (5.3)   | 36 (10.2)  | 41 (9.2)   | 0.145             |
| • P.aeruginosa                               | 0         | 5 (1.4)    | 5 (1.4)    | 0.589             |
| • VRE                                        | 1 (1.1)   | 6 (1.7)    | 7 (1.6)    | > 0.99            |
| • ESBL                                       | 2 (2.1)   | 9 (2.5)    | 11 (2.5)   | > 0.99            |
| • MRSA                                       | 0         | 4 (1.1)    | 4 (1.1)    | 0.302             |
| • Candida                                    | 1 (1.1)   | 5 (1.4)    | 6 (1.3)    | > 0.99            |
| <b>Post BSI:</b>                             |           |            |            |                   |

|                                                          |           |            |            |                  |
|----------------------------------------------------------|-----------|------------|------------|------------------|
| • Candedemia                                             | 3 (3.2)   | 4 (1.1)    | 7 (1.6)    | 0.158            |
| <b>General combination</b>                               | 1 ± 1     | 2 ± 1      | 2 ± 1      | 0.538            |
| <b>Empiric therapy:</b>                                  | 52 (55.9) | 250 (71)   | 302 (67.9) | <b>0.006</b>     |
| • Empiric therapy appropriate                            | 32 (56.1) | 115 (45.5) | 147 (47.4) | 0.144            |
| • Days Empiric therapy                                   | 7 ± 9     | 13 ± 10    | 11 ± 10    | 0.815            |
| • Combination empiric                                    | 1 ± 1     | 2 ± 1      | 2 ± 1      | 0.696            |
| <b>Targeted therapy:</b>                                 | 84 (92.3) | 263 (74.5) | 347 (78.2) | <b>&lt;0.001</b> |
| • Days Targeted Therapy                                  | 8 ± 4     | 10 ± 7     | 15 ± 13    | 0.187            |
| • Combination targeted                                   | 1 ± 1     | 2 ± 1      | 2 ± 1      | 0.439            |
| On-time therapy                                          | 63 (70.8) | 214 (61)   | 277 (63)   | 0.087            |
| <b>7-day nephrotoxicity:</b>                             |           |            |            | 0.155            |
| • nephrotoxicity                                         | 15 (34.9) | 59 (25.7)  | 74 (27.1)  |                  |
| • Acute renal failure at baseline or death before 7 days | 13 (30.2) | 54 (23.5)  | 67 (24.5)  |                  |
| Time to death                                            | 17 ± 10   | 25 ± 12    | 21 ± 26    | 0.449            |
| In-hospital mortality                                    | 28 (29.5) | 147 (41.6) | 175 (39.1) | <b>0.031</b>     |
| 30-day mortality                                         | 26 (27.4) | 127 (36)   | 153 (34.2) | 0.116            |

ICU: intensive care unit, SOT: solid organ transplant, HIV: Human immunodeficiency virus, CVC: central venous catheter, ECMO: extracorporeal membrane oxygenation, CVVH: continuous veno-venous hemofiltration, KPC: Klebsiella pneumoniae carbapenemase, VRE: vancomycin resistant enterococci, ESBL: extended spectrum beta lactamase, MRSA: methicillin resistant Staphylococcus aureus, CDI: Clostridium difficile infection.
